# Supplementary material
Source: Springer Nature journal article supplement (https://www.springermedizin.de/resource/supplementary/12957_2013_1567_MOESM4_ESM.pdf/9563948)

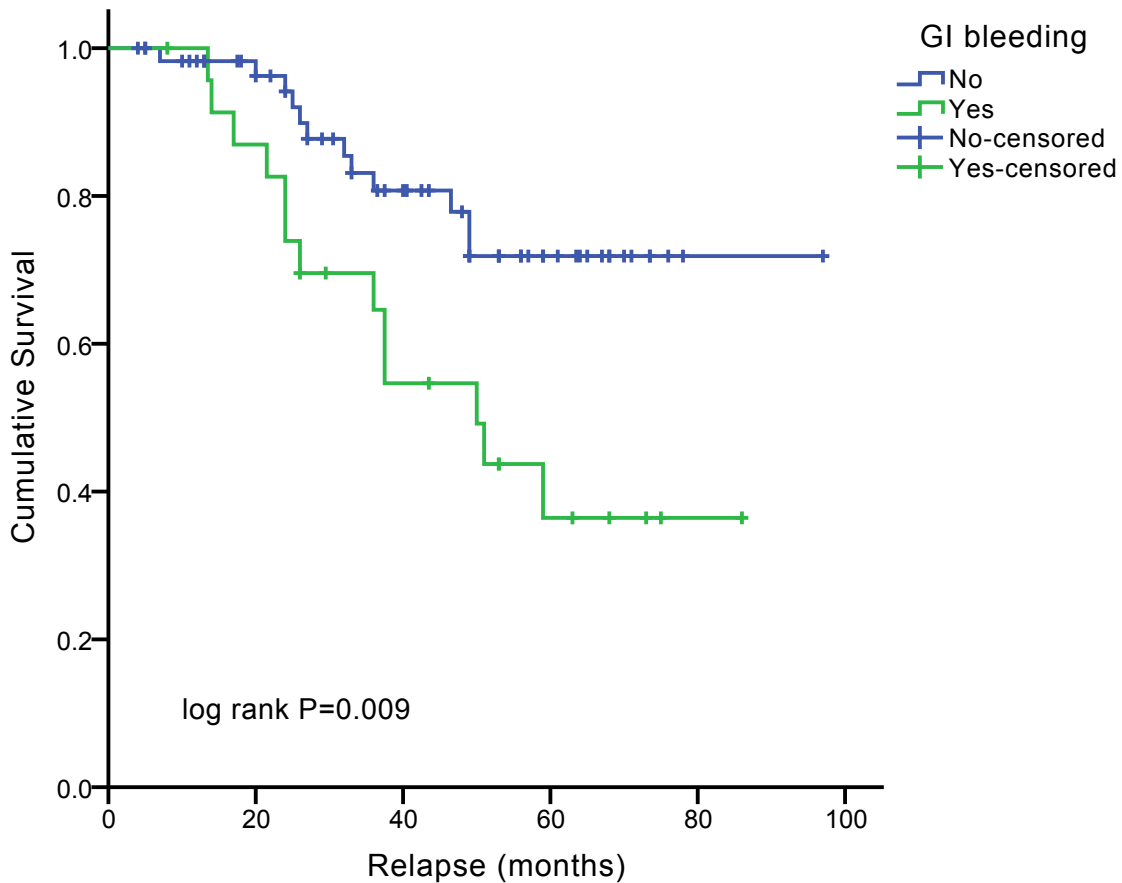

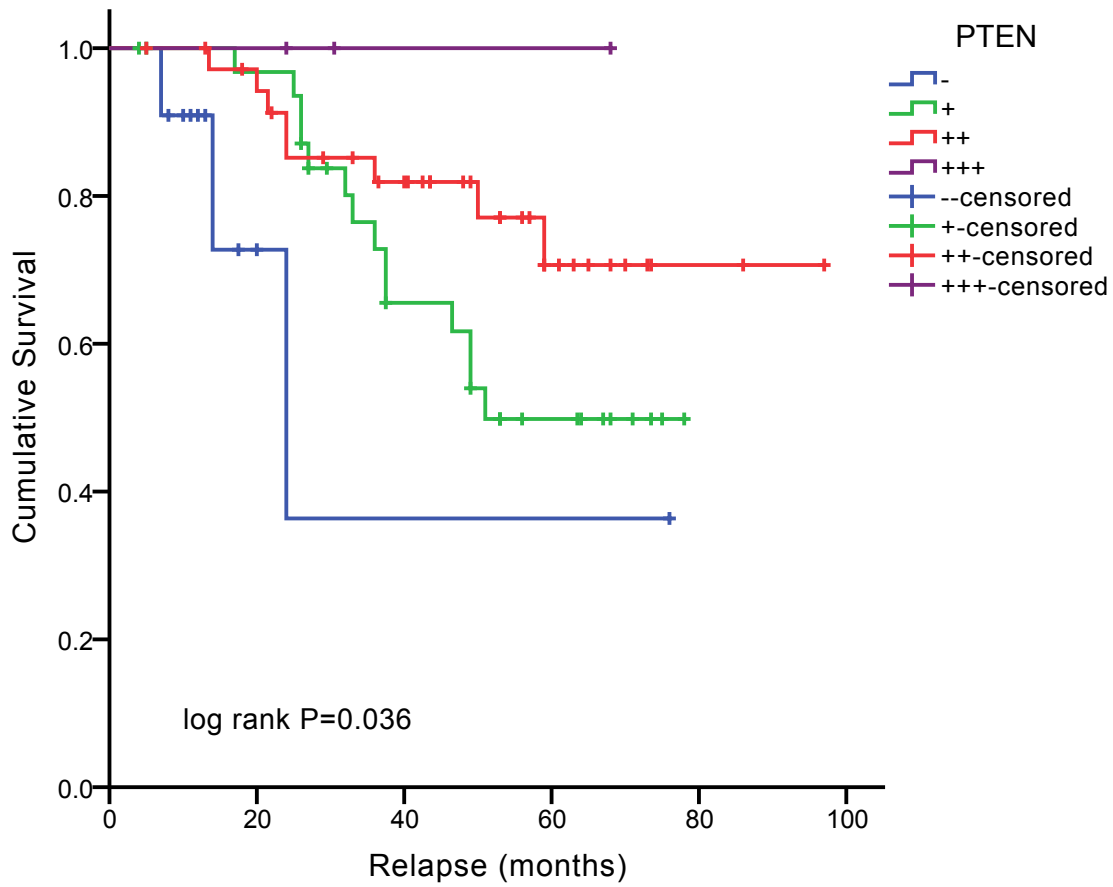

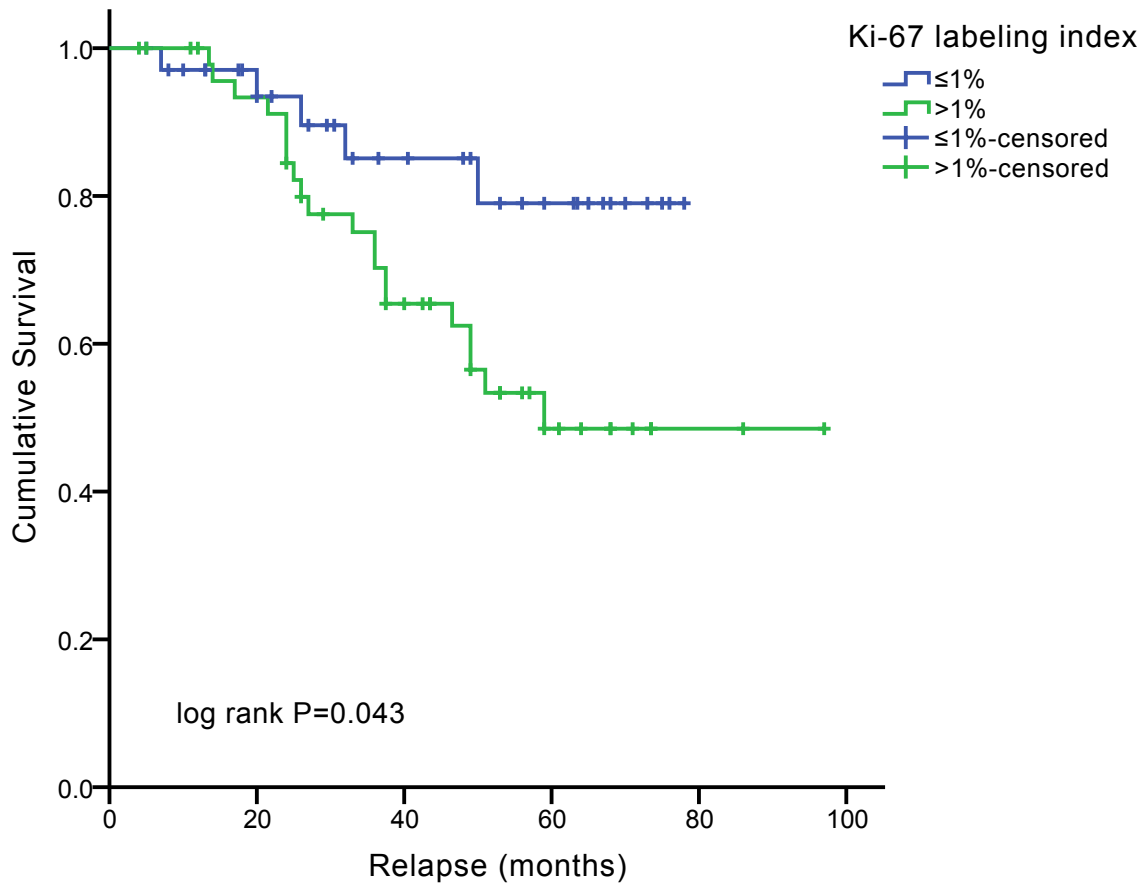

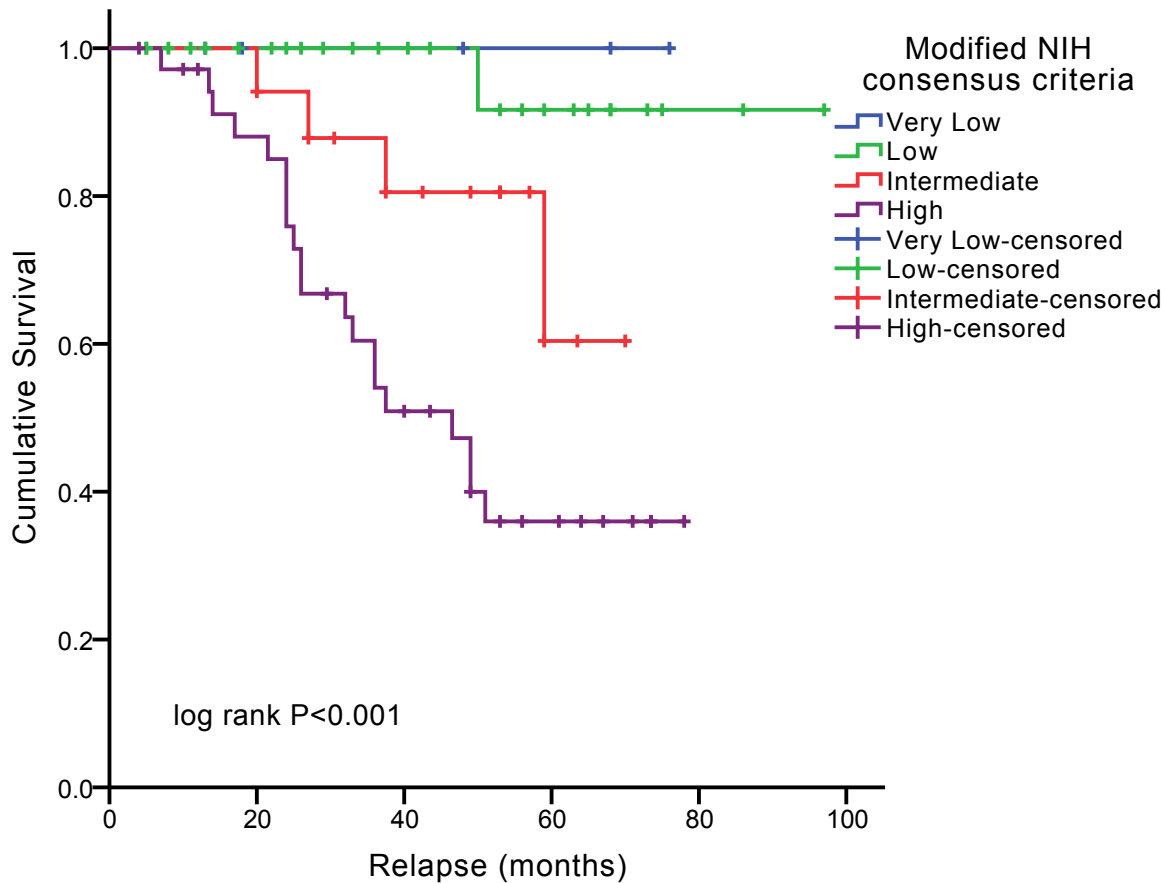

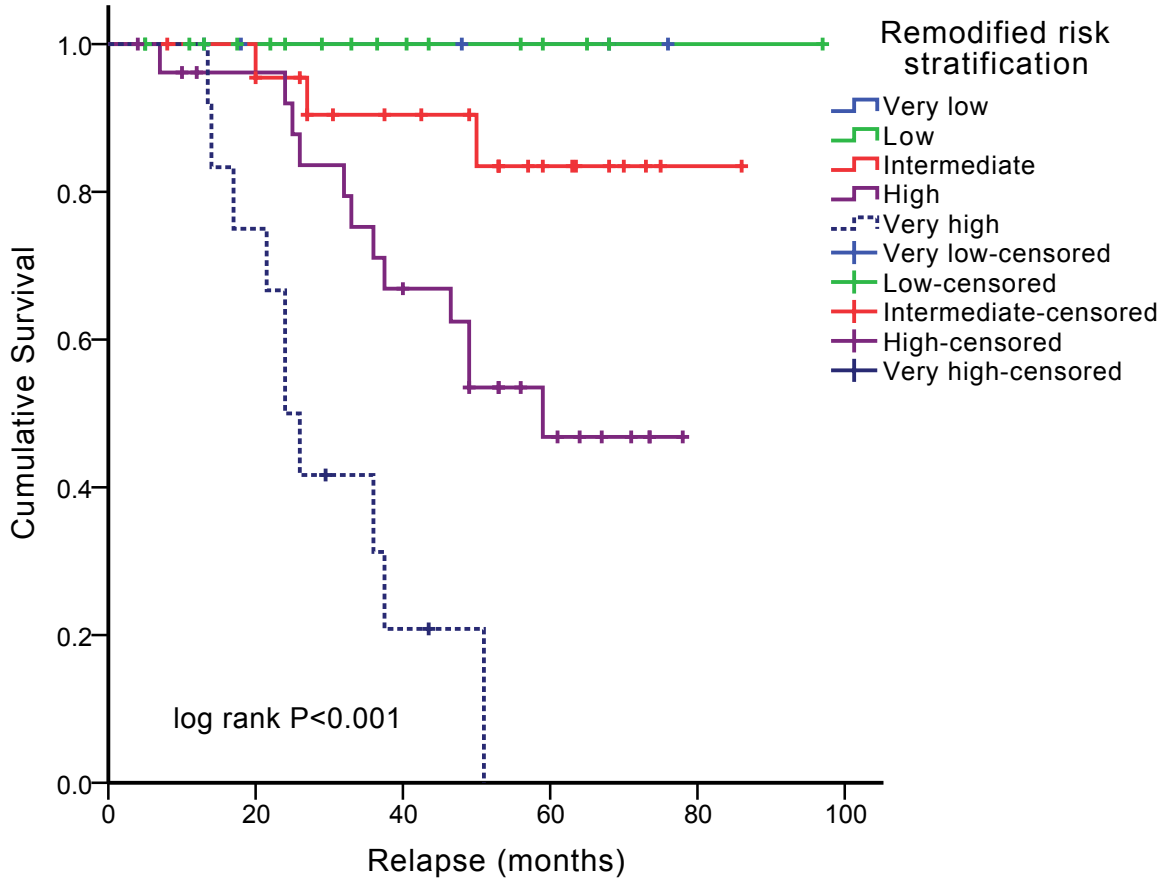

Supplement: MOESM4 [file 9563948]
